# Supplementary material
Source: PubMed Central journal article supplement (PMC3137144)

**VIRAL-MEDIATED INHIBITION OF ANTIOXIDANT ENZYMES CONTRIBUTES TO  
THE PATHOGENESIS OF SEVERE RSV BRONCHIOLITIS**

Yashoda M. Hosakote, Paul D. Jantzi, Dana L. Esham, Heidi Spratt, Alexander Kurosky  
Antonella Casola, and Roberto P. Garofalo

**ONLINE DATA SUPPLEMENT**

**Figure E1. Densitometric analysis of AOE expression in BAL.** Densitometric analysis of Western blot band intensities of Fig.1 was performed using Alpha Ease software, version 2200 (2.2d) (Alpha Innotech Co., San Leandro, CA). Bands in RSV-infected samples were normalized to uninfected control sample background. Bar graphs are mean  $\pm$  SEM. \* $p < 0.05$ ; \*\* $p < 0.01$  and \*\*\* $p < 0.001$  relative to control mice.

**Figure E2. Close-up view of SYPRO Ruby-stained 2DE of BAL proteins, showing decreased AOE expression in RSV-infected mice.** BAL proteins were prepared from control and RSV-infected mice (day 3) and subjected to 2DE. The gels were stained with SYPRO Ruby. The regions of the gels containing the spots corresponding to SOD 1, Catalase, GPx 1 and GST-mu are shown enlarged and circled (one gel from control and two gels from RSV-infected mice for each AOE).

**Figure E3. Close-up view of SYPRO Ruby-stained 2DE of NPS proteins.** NPS proteins collected from three patients each with diagnosis of RSV-positive URTI (A), bronchiolitis (B), hypoxic bronchiolitis (C) and requiring ventilatory support (D) were subjected to 2DE. The regions of the SYPRO Ruby-stained gels containing the spots corresponding to SOD 1, Catalase, and Peroxiredoxin 1 are shown enlarged and circled, showing smaller protein spot volumes in more severe illness.

**Figure E4. AOE are reduced in BAL of hMPV-infected mice.** Groups of mice were infected with hMPV or sham inoculated with saline (Control) and BAL was collected at days 1, 3, 5, and 7. BAL proteins were resolved on 10% SDS-PAGE and Western blots were performed using

antibodies against SOD 1, 2, catalase and GST-mu. Membranes were stripped and reprobed for  $\beta$ -actin as an internal control for protein integrity and loading. Lanes 1-3 are BAL from three control and 4-6 from three hMPV-infected mice at each time point. The figure is representative of two independent experiments, each experiment with 3 mice/group/time point.

Fig. E1

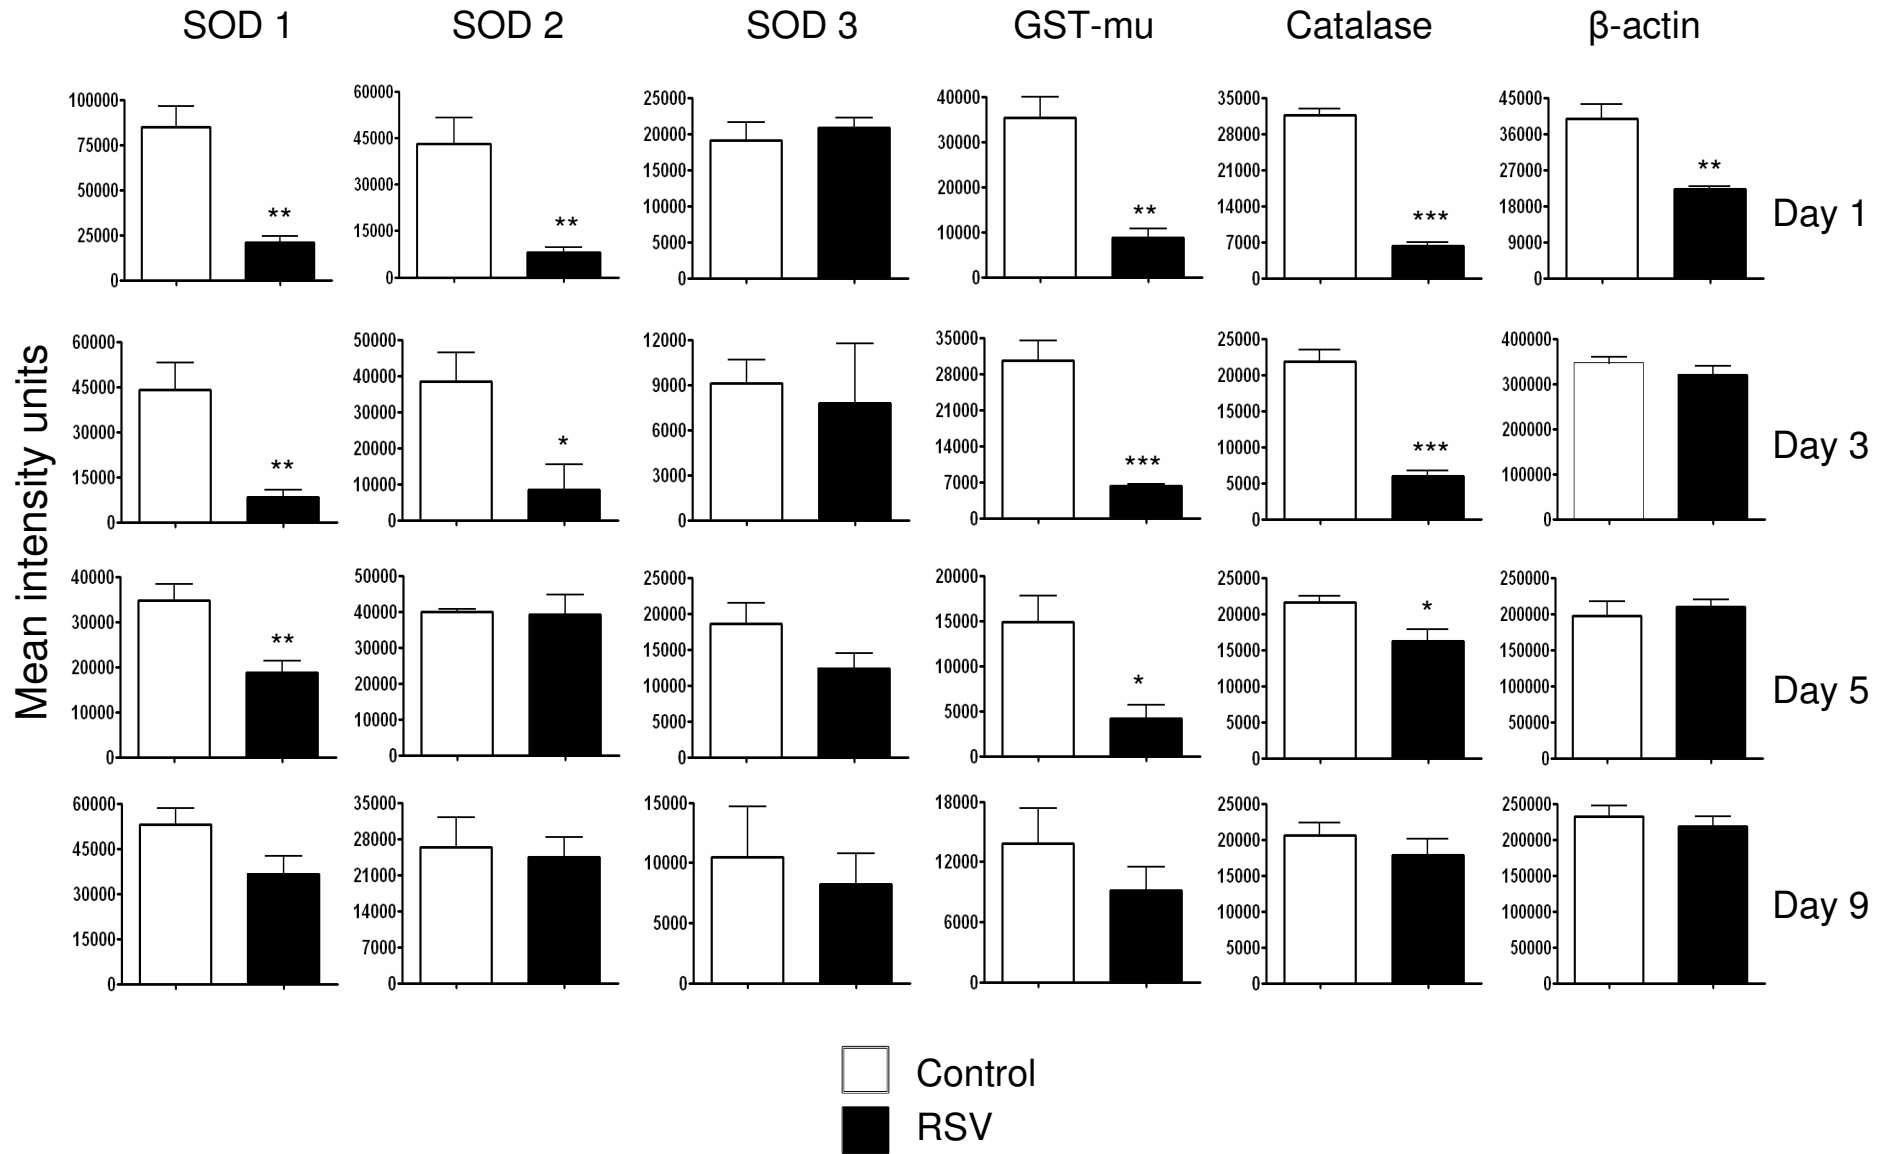

Fig. E2

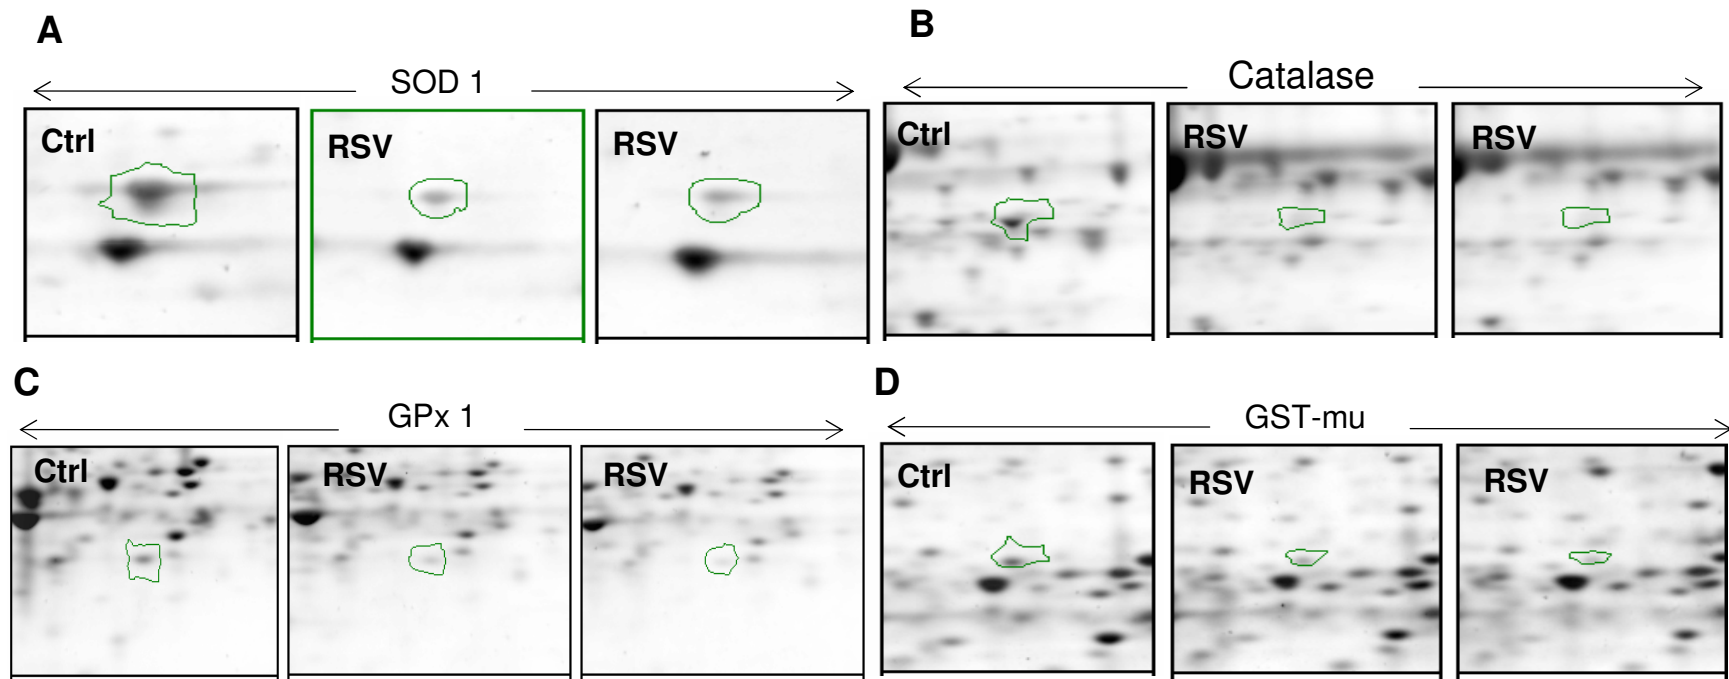

Fig. E3

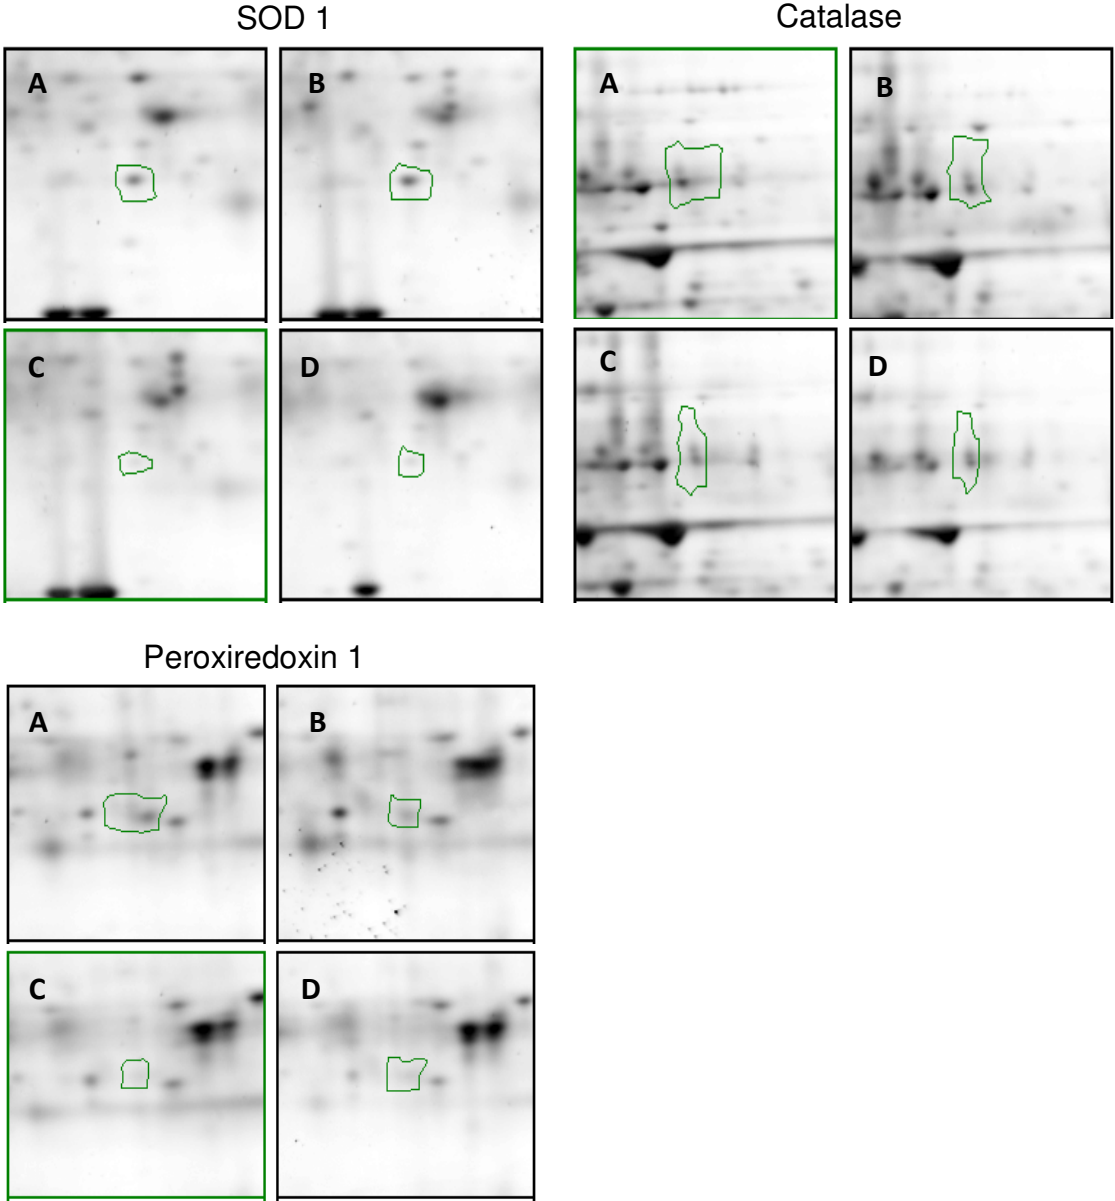

Supplement: supp_183_11_1550__1.pdf [file supp_183_11_1550__1.pdf]
